# Supplementary material for: Vertically aligned boron-doped diamond nanostructures as highly efficient electrodes for electrochemical supercapacitors
Source: Royal Society of Chemistry journal article supplement (doi:10.1039/d3ta07728d), 2024-01-01
Supplement: d3ta07728d1.pdf [file d3ta07728d1.pdf]

## Supporting Information

### **Vertically aligned boron-doped diamond nanostructures as highly efficient electrodes for electrochemical supercapacitors**

Shradha Suman,<sup>ab</sup> Dhananjay Kumar Sharma,<sup>c</sup> Ondrej Szabo,<sup>c</sup> Benadict Rakesh,<sup>ab</sup> Umaphathi Balaji,<sup>ab</sup> Marian Marton,<sup>d</sup> Marian Vojs,<sup>d</sup> Andrej Vincze,<sup>e</sup> Soumya Prakash Dutta,<sup>ab</sup> Debidutta Debasish,<sup>ab</sup> Ramasamy Sakthivel,<sup>ab</sup> Kamatchi Jothiramalingam Sankaran,<sup>\*ab</sup> and Alexander Kromka<sup>\*c</sup>

<sup>a</sup>*CSIR-Institute of Minerals and Materials Technology, Bhubaneswar 751013, India. E-mail: kjsankaran@immt.res.in*

<sup>b</sup>*Academy of Scientific and Innovative Research (AcSIR), Ghaziabad 201002, India.*

<sup>c</sup>*Institute of Physics of the Czech Academy of Sciences, 16200 Prague, Czech Republic. E-mail: kromka@fzu.cz*

<sup>d</sup>*Institute of Electronics and Photonics, Slovak University of Technology, 81219 Bratislava, Slovakia.*

<sup>e</sup>*International Laser Centre, Slovak Centre of Scientific and Technical Information (SCSTI), 84104 Bratislava, Slovak Republic*

---

#### **Mechanism of boron-doping into diamond lattice:**

The boron doping in diamond films is done at the synthesis step. The precursor gas contains the boron to be doped in the diamond lattice. For the BDD film growth, Trimethyl borate (TMBT) was used as the carbon, boron and oxygen source. The flow rate of TMBT for the formation of the pristine sample is optimised for the two morphological BDD.<sup>S1</sup> TMBT under microwave plasma conditions gives rise to a number of plasma-activated reactions within the processing chamber.<sup>S2</sup> A set of chemical reactions have been proposed to be occurring during the plasma process, which implies the generation of free active C and B atoms:

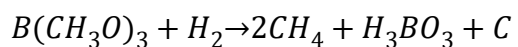

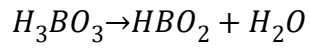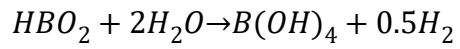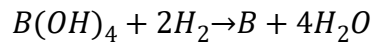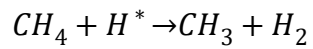

The presence of methyl radical in the plasma promotes the diamond growth while the free active boron atom dopes the diamond resulting in BDD.<sup>1,2</sup>

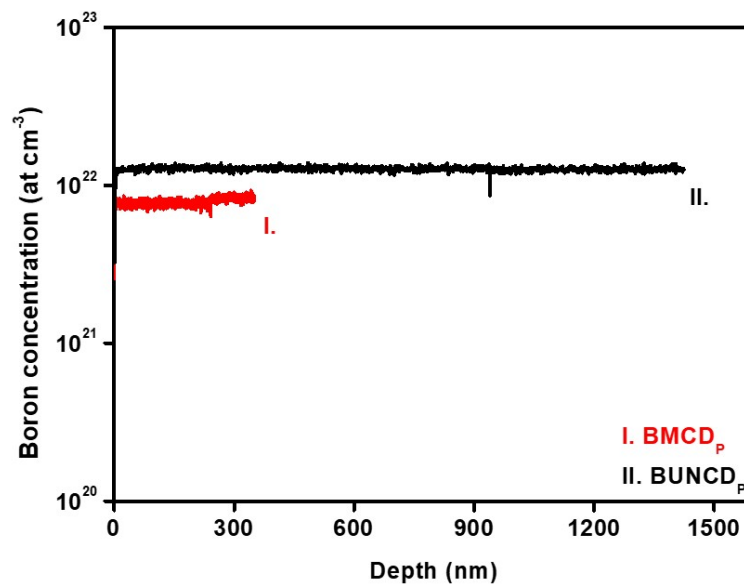

Fig. S1. ToF-SIMS positive ion depth profiles for I. BMCD<sub>p</sub> and II. BUNCD<sub>p</sub>.

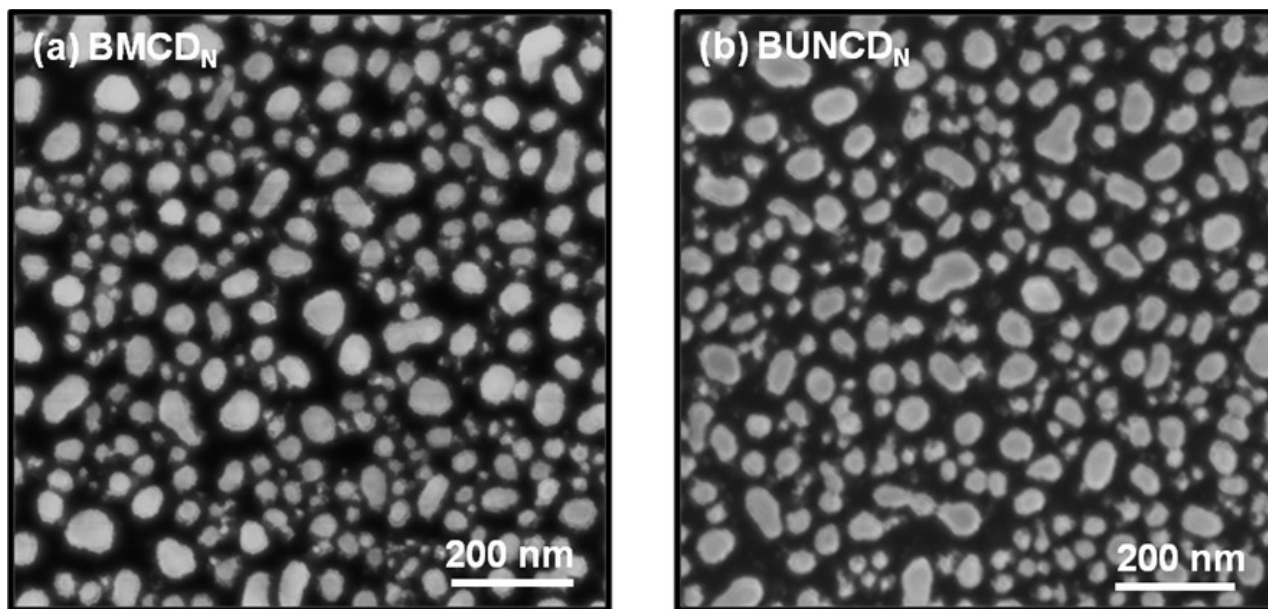

Fig. S2. The top view FESEM images of (a)  $\text{BMCD}_N$ , and (b)  $\text{BUNCD}_N$ .

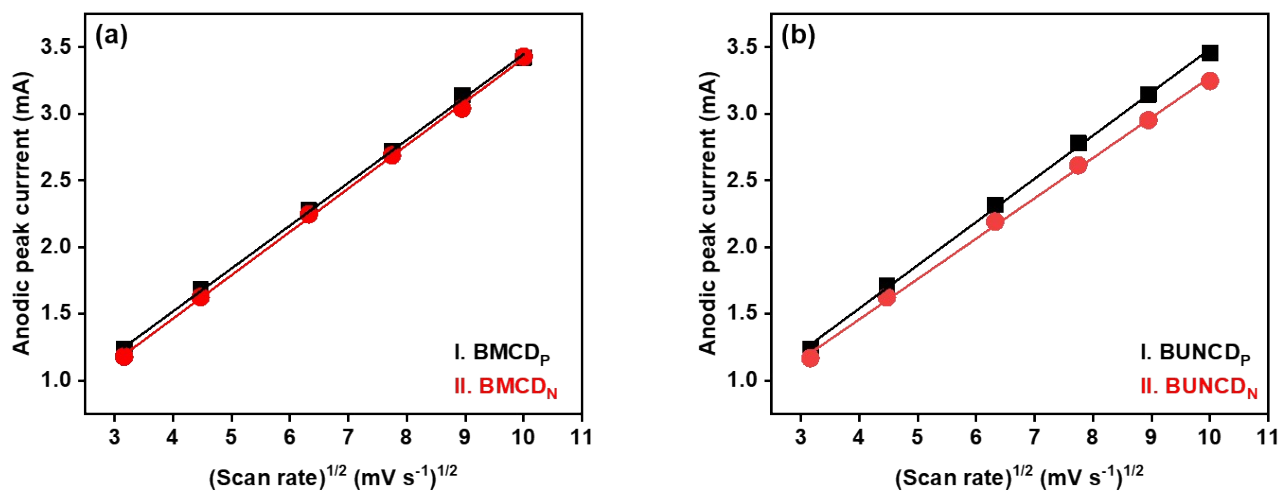

Fig. S3. The comparison of anodic peak current versus square root of scan rate in the  $0.05\text{M Fe(CN)}_6^{3-/4-}$  in  $1\text{M Na}_2\text{SO}_4$  electrolyte of (a) BMCD series: I.  $\text{BMCD}_P$ , and II.  $\text{BMCD}_N$ , (b) BUNCD series: I.  $\text{BUNCD}_P$ , and II.  $\text{BUNCD}_N$ .

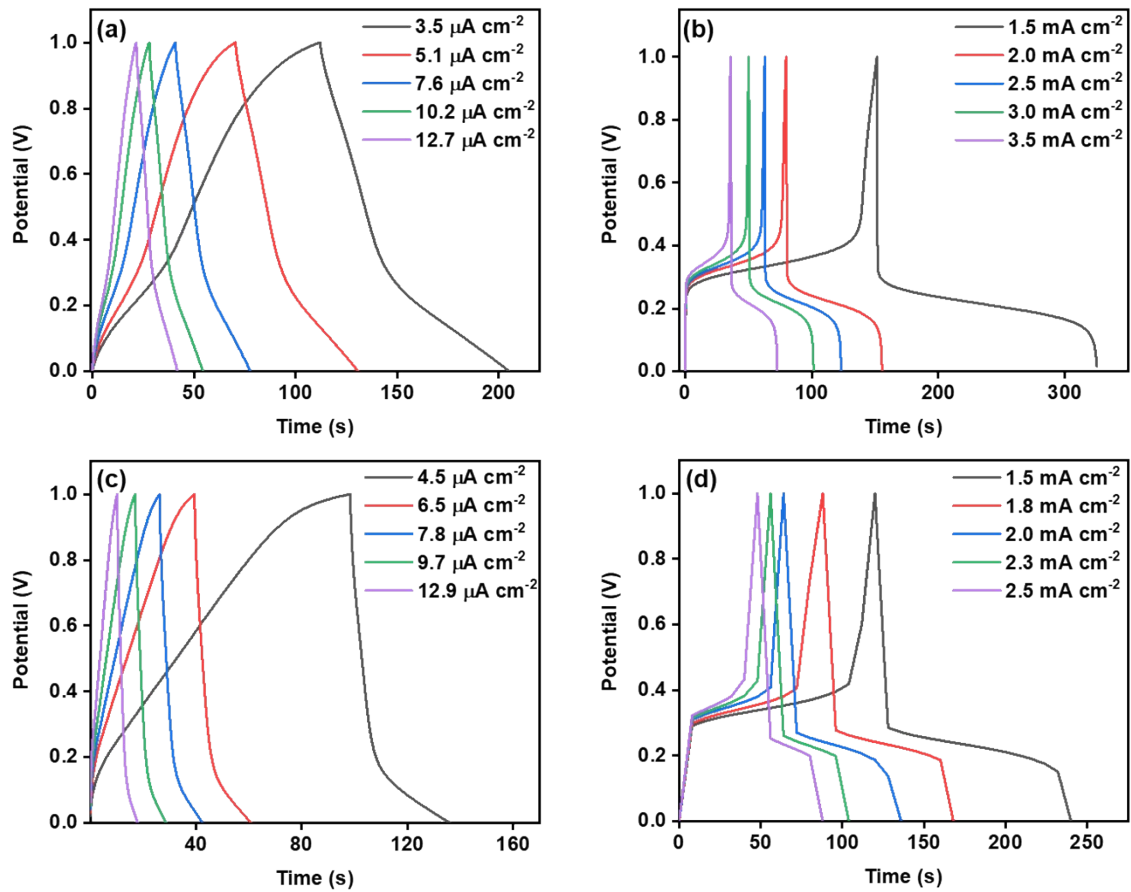

Fig. S4. The galvanostatic charging discharging measurement in 1M Na<sub>2</sub>SO<sub>4</sub> for (a) BMCD<sub>p</sub> and (c) BUNCD<sub>p</sub>, and in the 0.05M Fe(CN)<sub>6</sub><sup>3-/4-</sup> in 1M Na<sub>2</sub>SO<sub>4</sub> electrolyte of (b) BMCD<sub>p</sub> and (d) BUNCD<sub>p</sub>.

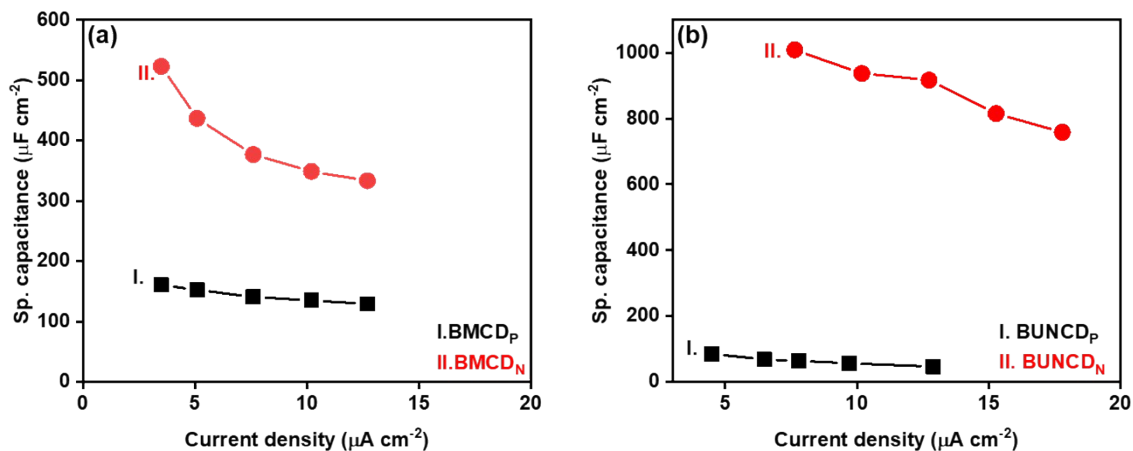

Fig. S5. The comparison of specific capacitance calculated from the GCD measurements in 1M Na<sub>2</sub>SO<sub>4</sub> of (a) BMCD series: I. BMCD<sub>P</sub> and II. BMCD<sub>N</sub>, (b) BUNCD series: I. BUNCD<sub>P</sub> and II. BUNCD<sub>N</sub>

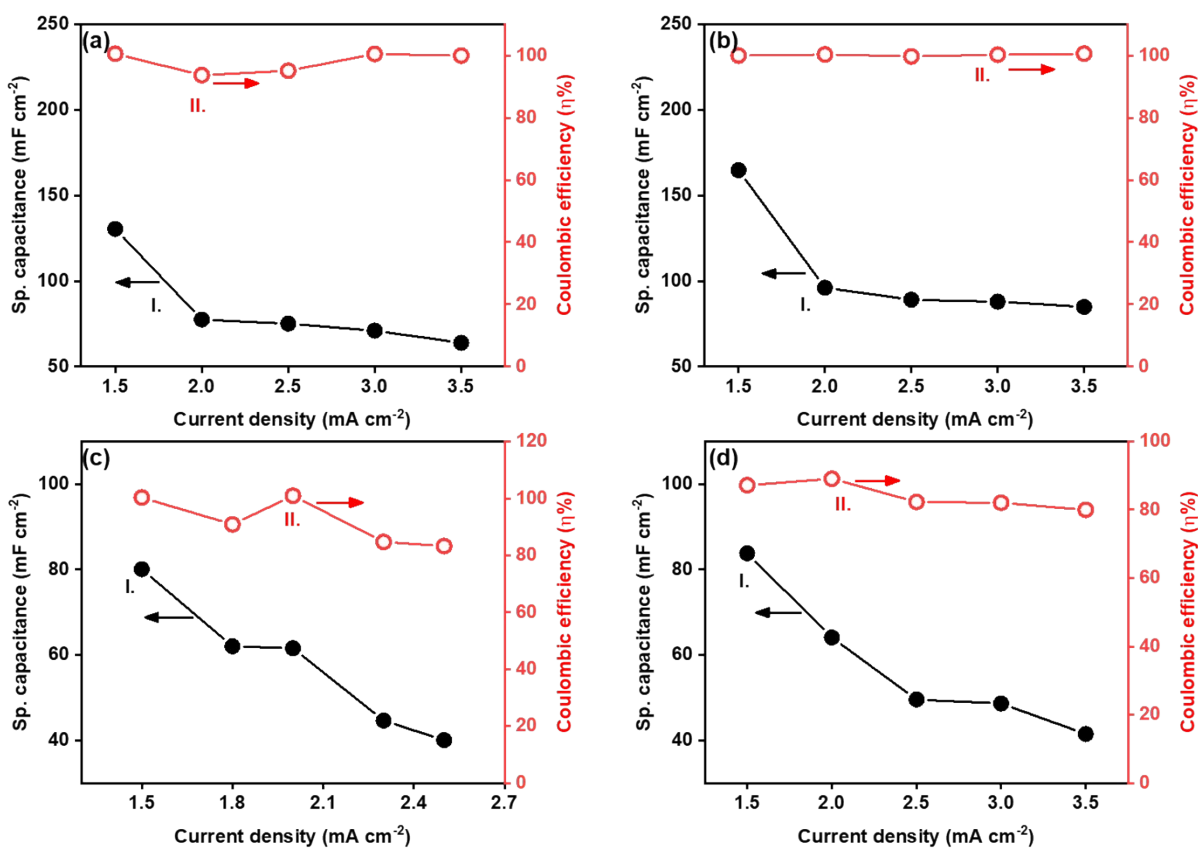

Fig. S6. The specific capacitance and coulombic efficiency plot measured in 0.05M Fe(CN)<sub>6</sub><sup>3-/4-</sup> in 1M Na<sub>2</sub>SO<sub>4</sub> electrolyte of (a) BMCD<sub>P</sub>, and (b) BMCD<sub>N</sub>, (c) BUNCD<sub>P</sub>, and (d) BUNCD<sub>N</sub>.

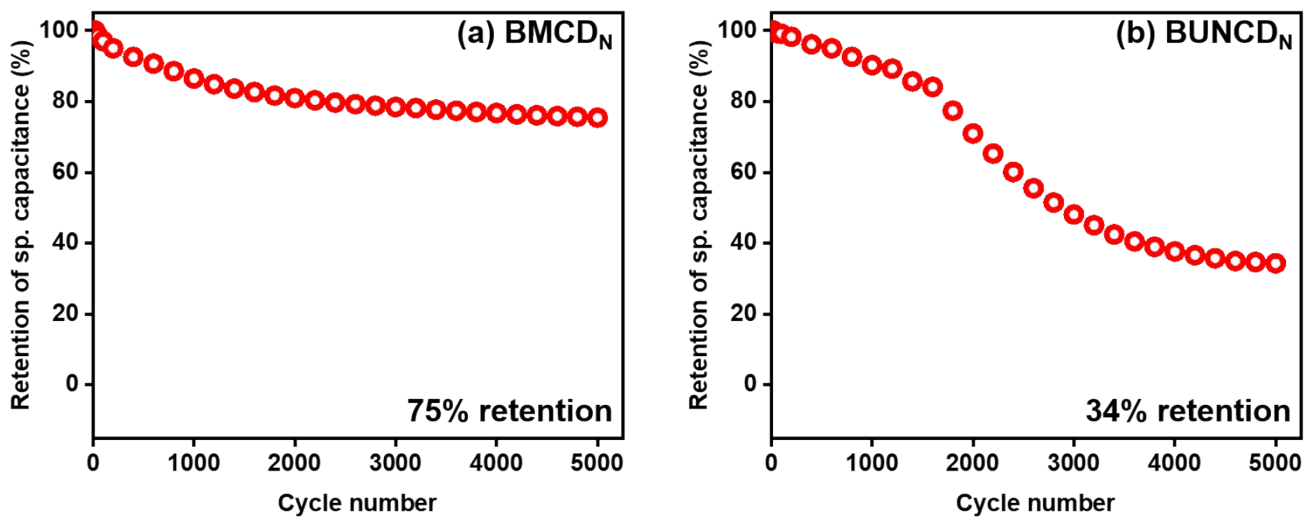

Fig. S7. Retention of specific capacitance in 0.05M  $[\text{Fe}(\text{CN})_6]^{3-/4-}$  in 1M  $\text{Na}_2\text{SO}_4$  electrolyte for (a)  $\text{BMCD}_N$  and (b)  $\text{BUNCD}_N$  sample.

The specific capacity retention of the nanostructured samples in the redox-active electrolyte is shown in Fig. S7. After 5000 cycles  $\text{BMCD}_N$  and  $\text{BUNCD}_N$  show 75% and 36% of retention of specific capacitance, respectively.

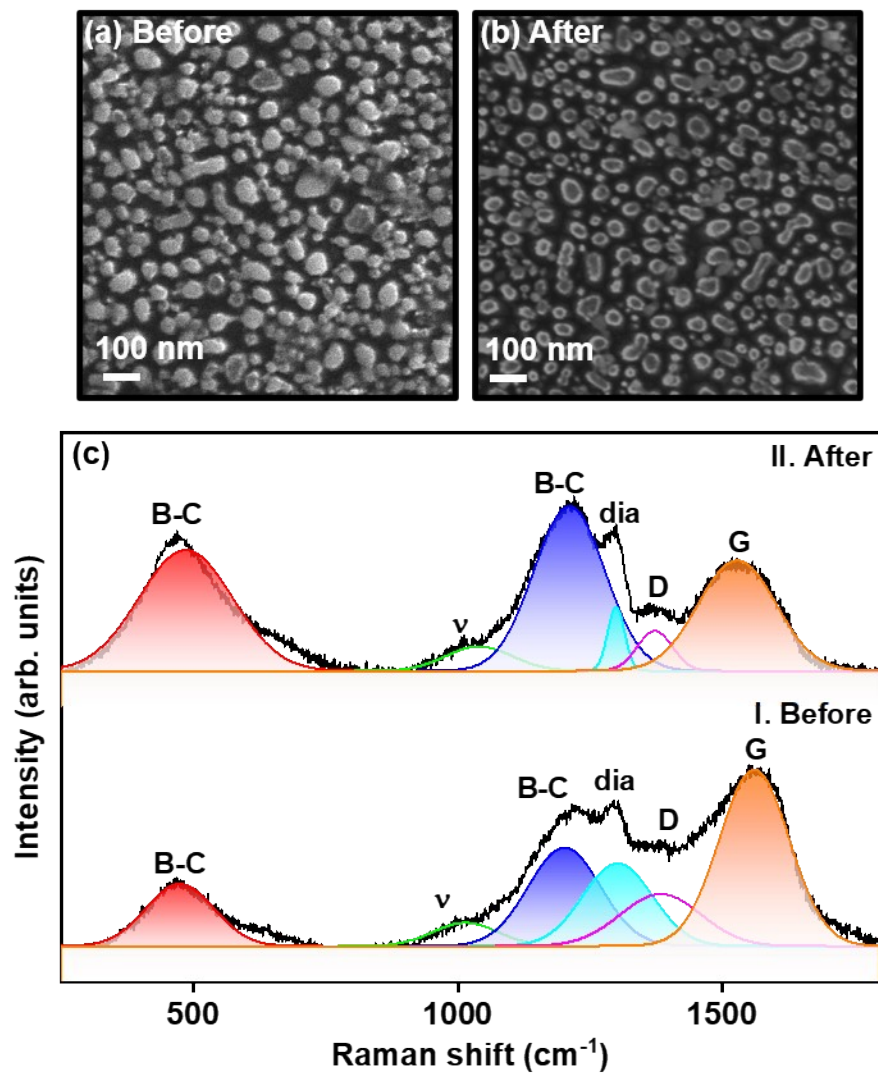

Fig. S8. FESEM micrographs of  $\text{BMCD}_N$  (a) before and (b) after 5000 cycles of charging-discharging in 1M  $\text{Na}_2\text{SO}_4$  and (c) comparison of Raman spectra I. before and II. after the lifecycle test in 1M  $\text{Na}_2\text{SO}_4$ .

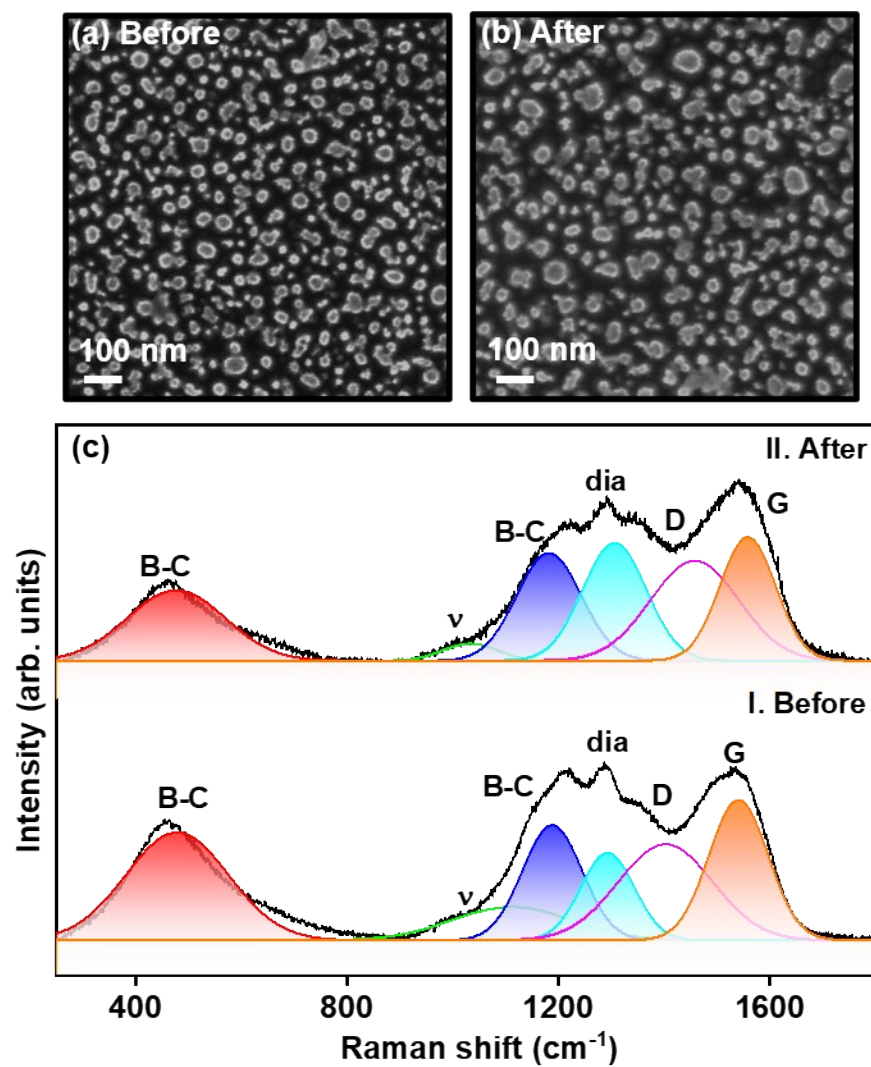

Fig. S9. FESEM micrographs of BUNCD<sub>N</sub> (a) before and (b) after 5000 cycles of charging-discharging in 1M Na<sub>2</sub>SO<sub>4</sub> and (c) comparison of Raman spectra I. before and II. after the lifecycle test in 1M Na<sub>2</sub>SO<sub>4</sub>.



Table S1: A comparison of characteristic Raman peaks of  $\text{BMCD}_N$  and  $\text{BUNCD}_N$  electrodes.

|                                    | $A_{\text{dia}}/A_G$ | $I_G/I_{\text{dia}}$ | $I_D/I_G$ |
|------------------------------------|----------------------|----------------------|-----------|
| <b><math>\text{BMCD}_N</math></b>  |                      |                      |           |
| <b>Before</b>                      | 0.0389               | 1.8588               | 0.3974    |
| <b>After</b>                       | 0.1105               | 1.4869               | 0.4821    |
| <b><math>\text{BUNCD}_N</math></b> |                      |                      |           |
| <b>Before</b>                      | 0.5660               | 1.6021               | 0.6819    |
| <b>After</b>                       | 1.0879               | 1.0471               | 0.8161    |

**References:**

S1. M. Marton, M. Vojs, P. Michniak, M. Behúl, V. Rehacek, M. Pifko, Š. Stehlík, and A. Kromka, *Diam Relat Mater* **126**, 109111 (2022).

S2. N. Makuch, P. Dziarski, M. Kulka, *Coatings*, **10**, 564 (2020).
